# Supplementary material
Source: PubMed Central journal article supplement (PMC2726722)

**A**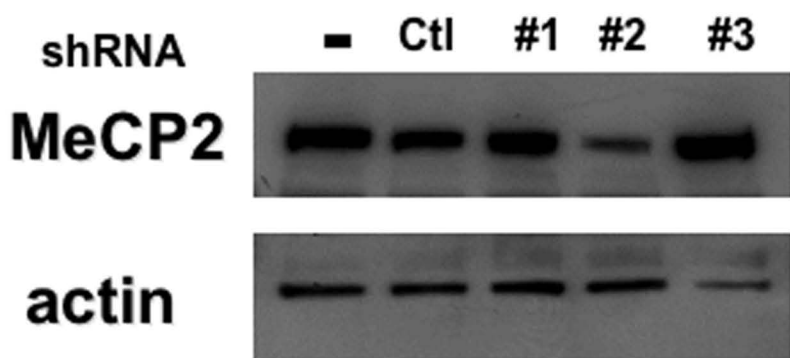**B**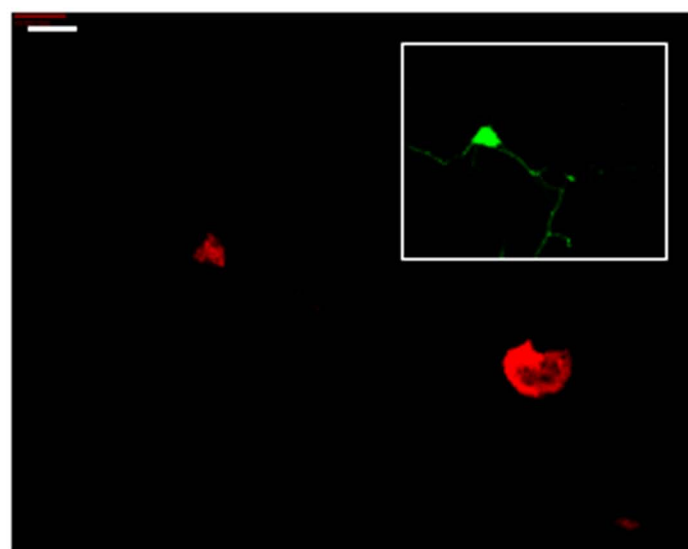**C**

wt MeCP2-GFP

T158M-GFP

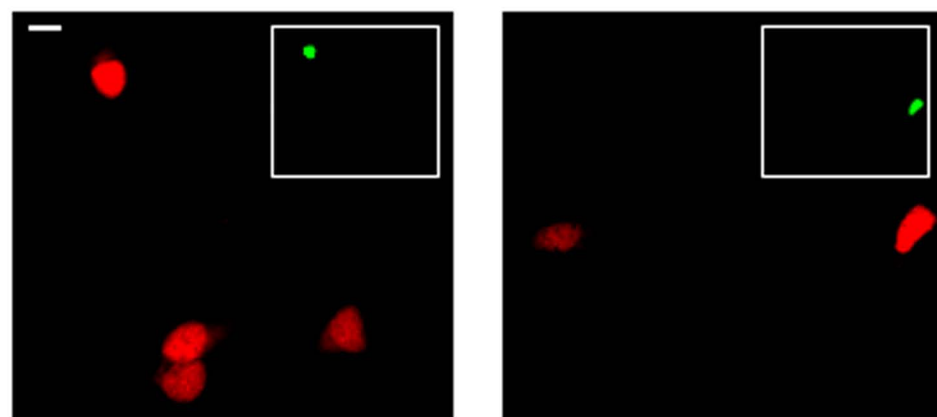**D**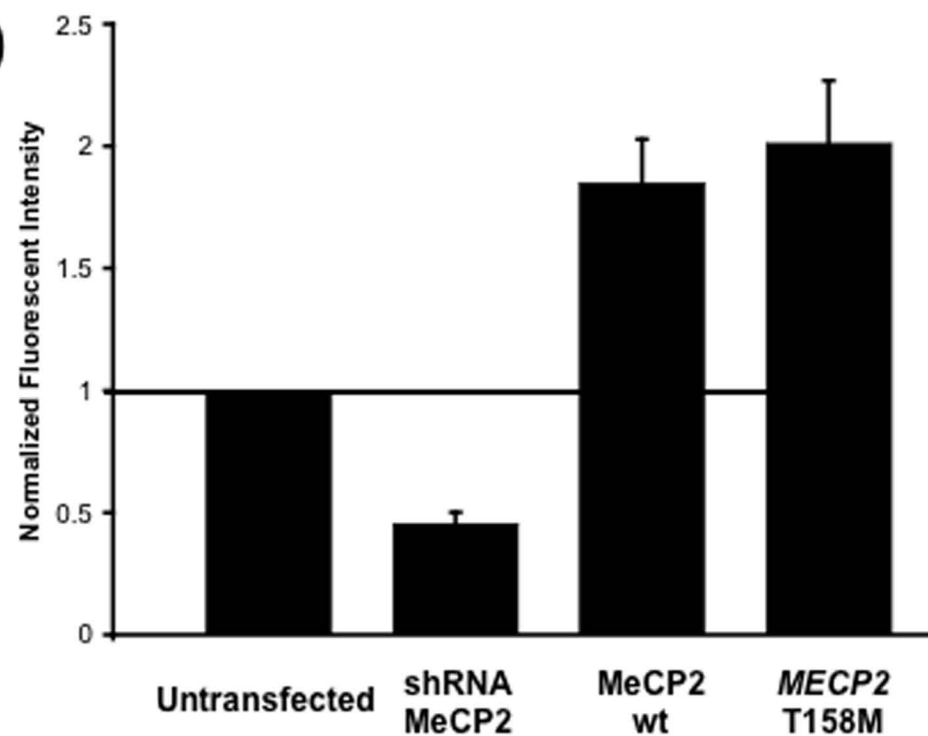

Supplement: NIHMS85361-supplement-01.pdf [file NIHMS85361-supplement-01.pdf]

**A**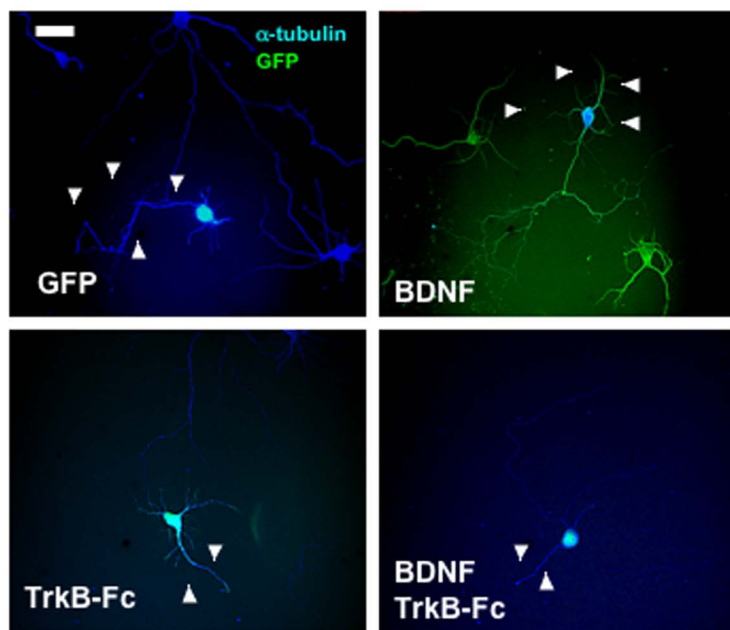**B****Axonal Branch Points**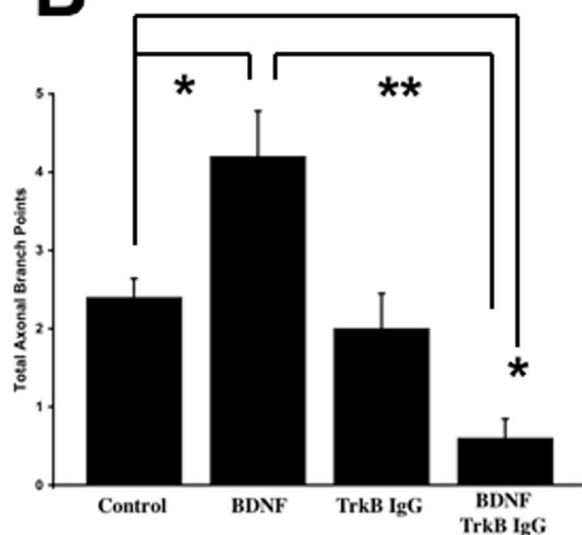**Axonal Length**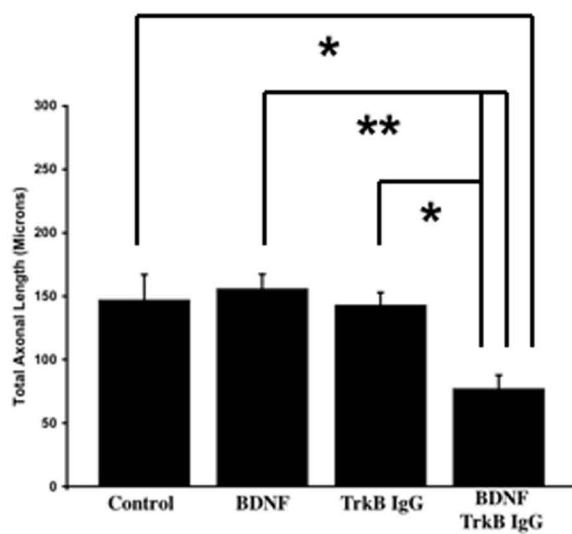**C****Dendritic Branch Points**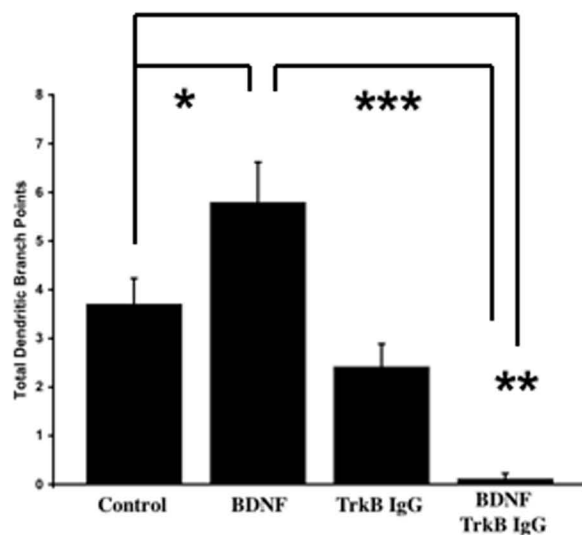**Dendritic Length**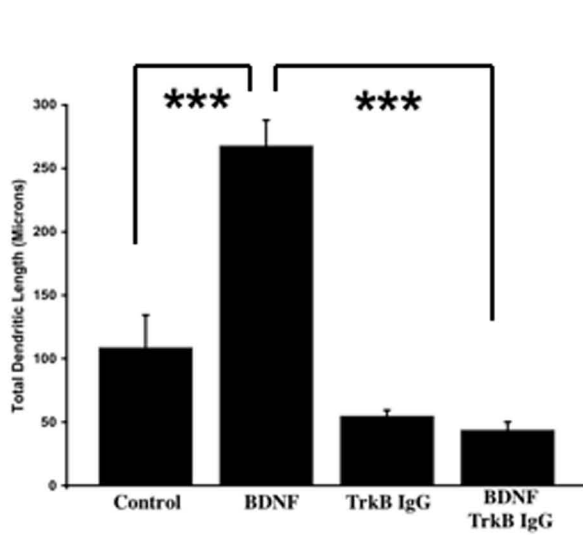

Supplement: NIHMS85361-supplement-03.pdf [file NIHMS85361-supplement-03.pdf]
